# Supplementary material for: Large Scale Analysis of Phenotype-Pathway Relationships Based on GWAS Results
Source: PLOS journal article supplement (doi:10.1371/journal.pone.0100887), 2014-07-09
Supplement: S1 (10.1371/journal.pone.0100887.s001) [file journal.pone.0100887.s001]

## Table of contents:

### 1. Supplementary Figure S1

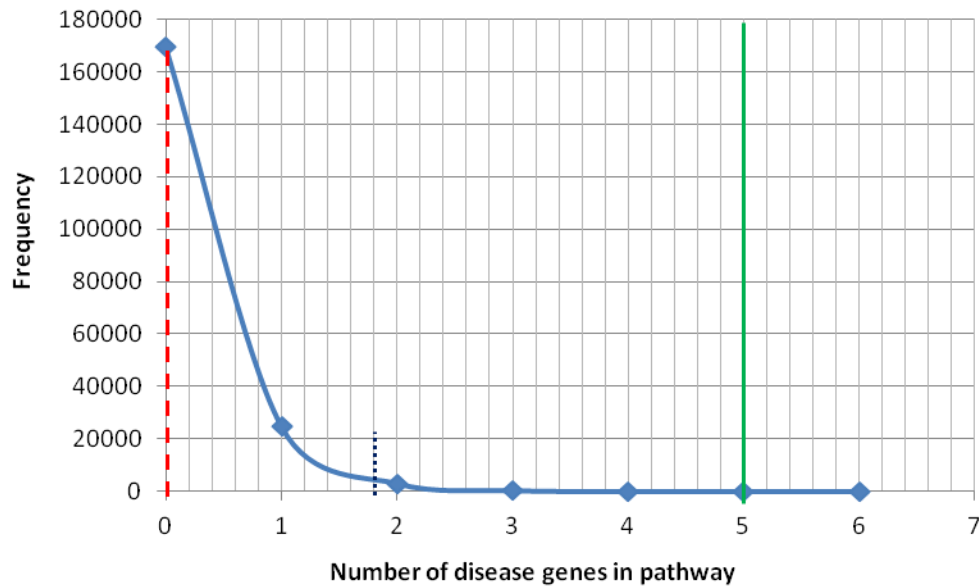

**Figure S1: Association of nasopharyngeal carcinoma to KEGG pathway hsa04514 (cell adhesion molecules).** Curve depicts the amount of randomly selected genes found in each pathway through 1,000 random runs. X-axis represents the number of genes in the pathway, while the Y-axis represents the frequency. The solid line depicts the actual number of NPC genes in pathway hsa04514 (5), while the dashed line depicts the median of all random runs (0). p-value is 0.01E-4. Any value higher than the dotted line is significant ( $< 0.05$ ).
