# Supplementary material for: Large Scale Analysis of Phenotype-Pathway Relationships Based on GWAS Results
Source: PLoS One. 2014 Jul 9;9(7):e100887. doi: 10.1371/journal.pone.0100887 (PMC4090199; doi:10.1371/journal.pone.0100887)
Supplement: Table S2 — Full list of phenotype-phenotype links and their scores. Table lists phenotype-phenotype links and the number of significant associations to the same pathways. (XLSX) [file pone.0100887.s003.xlsx]

## Sheet: cytoscape_network_12
Disease 1	Disease 2	# of co-associated pathways
rheumatoid arthritis	type 1 diabetes	10
rheumatoid arthritis	nephropathy	10
rheumatoid arthritis	primary biliary cirrhosis	10
type 1 diabetes	primary biliary cirrhosis	9
vitiligo	hiv-1 control and replication	9
hiv-1 control and replication	nasopharyngeal carcinoma	8
vitiligo	nasopharyngeal carcinoma	8
nephropathy	type 1 diabetes	8
nephropathy	primary biliary cirrhosis	8
primary biliary cirrhosis	multiple sclerosis	7
hiv-1 control and replication	primary biliary cirrhosis	7
rheumatoid arthritis	hiv-1 control and replication	7
rheumatoid arthritis	nasopharyngeal carcinoma	7
rheumatoid arthritis	vitiligo	7
rheumatoid arthritis	multiple sclerosis	7
nephropathy	hiv-1 control and replication	7
nephropathy	vitiligo	7
nephropathy	nasopharyngeal carcinoma	7
ulcerative colitis	primary biliary cirrhosis	7
celiac disease	type 1 diabetes	6
celiac disease	crohn's disease	6
celiac disease	primary biliary cirrhosis	6
hiv-1 control and replication	multiple sclerosis	6
nasopharyngeal carcinoma	multiple sclerosis	6
nasopharyngeal carcinoma	primary biliary cirrhosis	6
type 1 diabetes	multiple sclerosis	6
rheumatoid arthritis	celiac disease	6
rheumatoid arthritis	ulcerative colitis	6
vitiligo	multiple sclerosis	6
vitiligo	primary biliary cirrhosis	6
ulcerative colitis	type 1 diabetes	6
celiac disease	ulcerative colitis	5
celiac disease	multiple sclerosis	5
hiv-1 control and replication	type 1 diabetes	5
nasopharyngeal carcinoma	type 1 diabetes	5
vitiligo	type 1 diabetes	5
nephropathy	multiple sclerosis	5
psoriatic arthritis	hiv-1 control and replication	4
type 1 diabetes	crohn's disease	4
rheumatoid arthritis	crohn's disease	4
vitiligo	psoriatic arthritis	4
nephropathy	ulcerative colitis	4
nephropathy	celiac disease	4
ulcerative colitis	crohn's disease	4
ulcerative colitis	multiple sclerosis	4
crohn's disease	primary biliary cirrhosis	4
celiac disease	hiv-1 control and replication	3
celiac disease	nasopharyngeal carcinoma	3
celiac disease	vitiligo	3
psoriatic arthritis	multiple sclerosis	3
psoriatic arthritis	nasopharyngeal carcinoma	3
psoriatic arthritis	primary biliary cirrhosis	3
rheumatoid arthritis	psoriatic arthritis	3
nephropathy	psoriatic arthritis	3
ulcerative colitis	hiv-1 control and replication	3
crohn's disease	multiple sclerosis	3
celiac disease	behcet's disease	2
celiac disease	psoriasis	2
celiac disease	psoriatic arthritis	2
behcet's disease	ulcerative colitis	2
behcet's disease	multiple sclerosis	2
behcet's disease	crohn's disease	2
behcet's disease	type 1 diabetes	2
behcet's disease	primary biliary cirrhosis	2
psoriatic arthritis	ulcerative colitis	2
psoriatic arthritis	type 1 diabetes	2
systemic lupus erythematosus	type 1 diabetes	2
systemic lupus erythematosus	primary biliary cirrhosis	2
hiv-1 control and replication	height	2
blood pressure	hiv-1 control and replication	2
c-reactive protein	psoriasis	2
c-reactive protein	ulcerative colitis	2
c-reactive protein	multiple sclerosis	2
c-reactive protein	crohn's disease	2
c-reactive protein	rheumatoid arthritis	2
c-reactive protein	celiac disease	2
c-reactive protein	behcet's disease	2
c-reactive protein	type 1 diabetes	2
c-reactive protein	primary biliary cirrhosis	2
hematological and biochemical traits	bladder cancer	2
coronary heart disease	hematological and biochemical traits	2
psoriasis	ulcerative colitis	2
psoriasis	multiple sclerosis	2
psoriasis	crohn's disease	2
psoriasis	behcet's disease	2
psoriasis	type 1 diabetes	2
psoriasis	primary biliary cirrhosis	2
rheumatoid arthritis	behcet's disease	2
rheumatoid arthritis	systemic lupus erythematosus	2
rheumatoid arthritis	psoriasis	2
vitiligo	ulcerative colitis	2
nephropathy	systemic lupus erythematosus	2
nephropathy	crohn's disease	2
ulcerative colitis	nasopharyngeal carcinoma	2
response to antipsychotic treatment	bladder cancer	2
response to antipsychotic treatment	height	2
response to antipsychotic treatment	hematological and biochemical traits	2
height	bladder cancer	2
upper aerodigestive tract cancers	esophageal cancer	2
amyotrophic lateral sclerosis	chronic kidney disease	1
attention deficit hyperactivity disorder	prostate cancer	1
attention deficit hyperactivity disorder	crohn's disease	1
attention deficit hyperactivity disorder	bladder cancer	1
attention deficit hyperactivity disorder	height	1
attention deficit hyperactivity disorder	hair morphology	1
attention deficit hyperactivity disorder	serum prostate-specific antigen levels	1
attention deficit hyperactivity disorder	pulmonary function	1
celiac disease	prostate cancer	1
celiac disease	attention deficit hyperactivity disorder	1
celiac disease	soluble levels of adhesion molecules	1
celiac disease	systemic lupus erythematosus	1
celiac disease	pulmonary function	1
celiac disease	bladder cancer	1
celiac disease	major depressive disorder	1
celiac disease	eosinophilic esophagitis (pediatric)	1
celiac disease	alzheimer's disease	1
celiac disease	coronary heart disease	1
celiac disease	bipolar disorder and schizophrenia	1
celiac disease	colorectal cancer	1
celiac disease	ankylosing spondylitis	1
celiac disease	hair morphology	1
celiac disease	asthma	1
celiac disease	height	1
celiac disease	hematological and biochemical traits	1
celiac disease	type 2 diabetes	1
celiac disease	response to antipsychotic treatment	1
celiac disease	inflammatory bowel disease	1
celiac disease	serum prostate-specific antigen levels	1
celiac disease	plasma eosinophil count	1
behcet's disease	asthma	1
behcet's disease	eosinophilic esophagitis (pediatric)	1
behcet's disease	plasma eosinophil count	1
acenocoumarol maintenance dosage	warfarin maintenance dose	1
psoriatic arthritis	psoriasis	1
psoriatic arthritis	crohn's disease	1
triglycerides	lipoprotein-associated phospholipase a2 activity and mass	1
primary biliary cirrhosis	plasma eosinophil count	1
osteoporosis	psoriasis	1
osteoporosis	ulcerative colitis	1
osteoporosis	multiple sclerosis	1
osteoporosis	asthma	1
osteoporosis	crohn's disease	1
osteoporosis	rheumatoid arthritis	1
osteoporosis	ankylosing spondylitis	1
osteoporosis	celiac disease	1
osteoporosis	c-reactive protein	1
osteoporosis	behcet's disease	1
osteoporosis	inflammatory bowel disease	1
osteoporosis	type 1 diabetes	1
osteoporosis	primary biliary cirrhosis	1
osteoporosis	plasma eosinophil count	1
soluble levels of adhesion molecules	systemic lupus erythematosus	1
soluble levels of adhesion molecules	multiple sclerosis	1
soluble levels of adhesion molecules	hiv-1 control and replication	1
soluble levels of adhesion molecules	major depressive disorder	1
soluble levels of adhesion molecules	nasopharyngeal carcinoma	1
soluble levels of adhesion molecules	type 1 diabetes	1
soluble levels of adhesion molecules	primary biliary cirrhosis	1
soluble levels of adhesion molecules	alzheimer's disease	1
systemic lupus erythematosus	red blood cell traits	1
systemic lupus erythematosus	serum markers of iron status	1
systemic lupus erythematosus	multiple sclerosis	1
systemic lupus erythematosus	nasopharyngeal carcinoma	1
chronic kidney disease	nasopharyngeal carcinoma	1
chronic kidney disease	multiple sclerosis	1
chronic kidney disease	protein quantitative trait loci	1
red blood cell traits	serum markers of iron status	1
red blood cell traits	primary biliary cirrhosis	1
hiv-1 control and replication	serum metabolites	1
hiv-1 control and replication	systemic lupus erythematosus	1
hiv-1 control and replication	chronic kidney disease	1
hiv-1 control and replication	protein quantitative trait loci	1
hiv-1 control and replication	crohn's disease	1
hiv-1 control and replication	bladder cancer	1
hiv-1 control and replication	cardiovascular disease risk factors	1
pulmonary function	prostate cancer	1
protein quantitative trait loci	multiple sclerosis	1
protein quantitative trait loci	parkinson's disease	1
blood pressure	serum metabolites	1
blood pressure	ulcerative colitis	1
blood pressure	bladder cancer	1
blood pressure	height	1
blood pressure	cardiovascular disease risk factors	1
blood pressure	primary biliary cirrhosis	1
bladder cancer	vertical cup-disc ratio	1
bladder cancer	pulmonary function	1
bladder cancer	prostate cancer	1
bladder cancer	primary biliary cirrhosis	1
bladder cancer	crohn's disease	1
major depressive disorder	systemic lupus erythematosus	1
major depressive disorder	multiple sclerosis	1
major depressive disorder	hiv-1 control and replication	1
major depressive disorder	nasopharyngeal carcinoma	1
major depressive disorder	type 1 diabetes	1
major depressive disorder	primary biliary cirrhosis	1
c-reactive protein	asthma	1
c-reactive protein	ankylosing spondylitis	1
c-reactive protein	eosinophilic esophagitis (pediatric)	1
c-reactive protein	inflammatory bowel disease	1
c-reactive protein	plasma eosinophil count	1
nasopharyngeal carcinoma	protein quantitative trait loci	1
nasopharyngeal carcinoma	crohn's disease	1
esophageal cancer	serum metabolites	1
type 1 diabetes	red blood cell traits	1
type 1 diabetes	asthma	1
type 1 diabetes	serum markers of iron status	1
type 1 diabetes	plasma eosinophil count	1
hematological and biochemical traits	pulmonary function	1
hematological and biochemical traits	attention deficit hyperactivity disorder	1
hematological and biochemical traits	crohn's disease	1
hematological and biochemical traits	vertical cup-disc ratio	1
hematological and biochemical traits	height	1
hematological and biochemical traits	hair morphology	1
hematological and biochemical traits	prostate cancer	1
hematological and biochemical traits	serum prostate-specific antigen levels	1
hematological and biochemical traits	type 1 diabetes	1
blue vs. green eyes	two-hour glucose challenge	1
blue vs. green eyes	upper aerodigestive tract cancers	1
alzheimer's disease	systemic lupus erythematosus	1
alzheimer's disease	multiple sclerosis	1
alzheimer's disease	hiv-1 control and replication	1
alzheimer's disease	major depressive disorder	1
alzheimer's disease	nasopharyngeal carcinoma	1
alzheimer's disease	type 1 diabetes	1
alzheimer's disease	primary biliary cirrhosis	1
coronary heart disease	bipolar disorder and schizophrenia	1
coronary heart disease	chronic kidney disease	1
coronary heart disease	type 1 diabetes	1
coronary heart disease	pulmonary function	1
coronary heart disease	crohn's disease	1
coronary heart disease	bladder cancer	1
coronary heart disease	amyotrophic lateral sclerosis	1
coronary heart disease	attention deficit hyperactivity disorder	1
coronary heart disease	hair morphology	1
coronary heart disease	prostate cancer	1
coronary heart disease	serum prostate-specific antigen levels	1
coronary heart disease	height	1
psoriasis	hiv-1 control and replication	1
psoriasis	eosinophilic esophagitis (pediatric)	1
psoriasis	inflammatory bowel disease	1
psoriasis	asthma	1
psoriasis	plasma eosinophil count	1
bipolar disorder and schizophrenia	pulmonary function	1
bipolar disorder and schizophrenia	crohn's disease	1
bipolar disorder and schizophrenia	bladder cancer	1
bipolar disorder and schizophrenia	height	1
bipolar disorder and schizophrenia	hair morphology	1
bipolar disorder and schizophrenia	prostate cancer	1
bipolar disorder and schizophrenia	serum prostate-specific antigen levels	1
bipolar disorder and schizophrenia	attention deficit hyperactivity disorder	1
bipolar disorder and schizophrenia	hematological and biochemical traits	1
colorectal cancer	bipolar disorder and schizophrenia	1
colorectal cancer	type 2 diabetes	1
colorectal cancer	response to antipsychotic treatment	1
colorectal cancer	pulmonary function	1
colorectal cancer	crohn's disease	1
colorectal cancer	bladder cancer	1
colorectal cancer	attention deficit hyperactivity disorder	1
colorectal cancer	height	1
colorectal cancer	hair morphology	1
colorectal cancer	prostate cancer	1
colorectal cancer	serum prostate-specific antigen levels	1
colorectal cancer	coronary heart disease	1
colorectal cancer	hematological and biochemical traits	1
eosinophilic esophagitis (pediatric)	type 1 diabetes	1
eosinophilic esophagitis (pediatric)	primary biliary cirrhosis	1
eosinophilic esophagitis (pediatric)	multiple sclerosis	1
eosinophilic esophagitis (pediatric)	crohn's disease	1
rheumatoid arthritis	soluble levels of adhesion molecules	1
rheumatoid arthritis	red blood cell traits	1
rheumatoid arthritis	major depressive disorder	1
rheumatoid arthritis	eosinophilic esophagitis (pediatric)	1
rheumatoid arthritis	alzheimer's disease	1
rheumatoid arthritis	ankylosing spondylitis	1
rheumatoid arthritis	asthma	1
rheumatoid arthritis	serum markers of iron status	1
rheumatoid arthritis	inflammatory bowel disease	1
rheumatoid arthritis	plasma eosinophil count	1
ankylosing spondylitis	psoriasis	1
ankylosing spondylitis	ulcerative colitis	1
ankylosing spondylitis	multiple sclerosis	1
ankylosing spondylitis	asthma	1
ankylosing spondylitis	crohn's disease	1
ankylosing spondylitis	behcet's disease	1
ankylosing spondylitis	inflammatory bowel disease	1
ankylosing spondylitis	type 1 diabetes	1
ankylosing spondylitis	primary biliary cirrhosis	1
ankylosing spondylitis	plasma eosinophil count	1
vitiligo	soluble levels of adhesion molecules	1
vitiligo	psoriasis	1
vitiligo	chronic kidney disease	1
vitiligo	protein quantitative trait loci	1
vitiligo	major depressive disorder	1
vitiligo	crohn's disease	1
vitiligo	systemic lupus erythematosus	1
vitiligo	height	1
vitiligo	alzheimer's disease	1
hypertriglyceridemia	triglycerides	1
hypertriglyceridemia	lipoprotein-associated phospholipase a2 activity and mass	1
nephropathy	soluble levels of adhesion molecules	1
nephropathy	red blood cell traits	1
nephropathy	major depressive disorder	1
nephropathy	serum markers of iron status	1
nephropathy	alzheimer's disease	1
hair morphology	prostate cancer	1
hair morphology	crohn's disease	1
hair morphology	bladder cancer	1
hair morphology	height	1
hair morphology	serum prostate-specific antigen levels	1
hair morphology	pulmonary function	1
asthma	multiple sclerosis	1
asthma	primary biliary cirrhosis	1
asthma	plasma eosinophil count	1
cardiovascular disease risk factors	bladder cancer	1
cardiovascular disease risk factors	primary biliary cirrhosis	1
cardiovascular disease risk factors	height	1
body mass index	serum metabolites	1
body mass index	hiv-1 control and replication	1
body mass index	protein quantitative trait loci	1
body mass index	blood pressure	1
ulcerative colitis	systemic lupus erythematosus	1
ulcerative colitis	bladder cancer	1
ulcerative colitis	serum markers of iron status	1
ulcerative colitis	red blood cell traits	1
ulcerative colitis	height	1
ulcerative colitis	eosinophilic esophagitis (pediatric)	1
ulcerative colitis	asthma	1
ulcerative colitis	cardiovascular disease risk factors	1
ulcerative colitis	plasma eosinophil count	1
type 2 diabetes	bipolar disorder and schizophrenia	1
type 2 diabetes	response to antipsychotic treatment	1
type 2 diabetes	pulmonary function	1
type 2 diabetes	crohn's disease	1
type 2 diabetes	bladder cancer	1
type 2 diabetes	attention deficit hyperactivity disorder	1
type 2 diabetes	height	1
type 2 diabetes	hair morphology	1
type 2 diabetes	prostate cancer	1
type 2 diabetes	serum prostate-specific antigen levels	1
type 2 diabetes	coronary heart disease	1
type 2 diabetes	hematological and biochemical traits	1
response to antipsychotic treatment	bipolar disorder and schizophrenia	1
response to antipsychotic treatment	pulmonary function	1
response to antipsychotic treatment	hiv-1 control and replication	1
response to antipsychotic treatment	ulcerative colitis	1
response to antipsychotic treatment	blood pressure	1
response to antipsychotic treatment	crohn's disease	1
response to antipsychotic treatment	cardiovascular disease risk factors	1
response to antipsychotic treatment	attention deficit hyperactivity disorder	1
response to antipsychotic treatment	hair morphology	1
response to antipsychotic treatment	prostate cancer	1
response to antipsychotic treatment	serum prostate-specific antigen levels	1
response to antipsychotic treatment	primary biliary cirrhosis	1
response to antipsychotic treatment	coronary heart disease	1
crohn's disease	prostate cancer	1
crohn's disease	asthma	1
crohn's disease	pulmonary function	1
crohn's disease	plasma eosinophil count	1
hdl cholesterol	triglycerides	1
hdl cholesterol	hypertriglyceridemia	1
hdl cholesterol	lipoprotein-associated phospholipase a2 activity and mass	1
serum markers of iron status	primary biliary cirrhosis	1
age-related macular degeneration	activated partial thromboplastin time	1
height	chronic kidney disease	1
height	prostate cancer	1
height	protein quantitative trait loci	1
height	crohn's disease	1
height	multiple sclerosis	1
height	nasopharyngeal carcinoma	1
height	pulmonary function	1
height	primary biliary cirrhosis	1
inflammatory bowel disease	ulcerative colitis	1
inflammatory bowel disease	multiple sclerosis	1
inflammatory bowel disease	asthma	1
inflammatory bowel disease	crohn's disease	1
inflammatory bowel disease	behcet's disease	1
inflammatory bowel disease	type 1 diabetes	1
inflammatory bowel disease	primary biliary cirrhosis	1
inflammatory bowel disease	plasma eosinophil count	1
serum prostate-specific antigen levels	bladder cancer	1
serum prostate-specific antigen levels	crohn's disease	1
serum prostate-specific antigen levels	prostate cancer	1
serum prostate-specific antigen levels	pulmonary function	1
serum prostate-specific antigen levels	height	1
metabolic syndrome	hdl cholesterol	1
metabolic syndrome	triglycerides	1
metabolic syndrome	hypertriglyceridemia	1
metabolic syndrome	lipoprotein-associated phospholipase a2 activity and mass	1
plasma eosinophil count	multiple sclerosis	1
upper aerodigestive tract cancers	serum metabolites	1
upper aerodigestive tract cancers	smoking cessation	1
